# Supplementary material for: Auroral vortex street formed by the magnetosphere–ionosphere coupling instability
Source: Copernicus journal article supplement (doi:10.5194/angeo-33-217-2015), 2015-02-26
Supplement: Supplementary file 1 [file angeo-33-217-2015-supplement.zip]

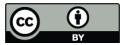

## *Supplement of*

# **Auroral vortex street formed by the magnetosphere–ionosphere coupling instability**

**Y. Hiraki**

*Correspondence to:* Y. Hiraki ([hiraki.yasutaka@nipr.ac.jp](mailto:hiraki.yasutaka@nipr.ac.jp))

- [angeo-33-217-2015-supplement-cover-letter.pdf](#)
- [fig2\\_anime\\_nlin.gif](#)
- [fig4a\\_anime\\_nlin.gif](#)
- [fig4b\\_anime\\_nlin.gif](#)
- [readme\\_movies.pdf](#)
